# Supplementary material for: In Silico Screening and In Vitro Assessment of Natural Products with Anti-Virulence Activity against Helicobacter pylori
Source: MDPI journal article supplement (doi:10.3390/molecules27010020), 2021-12-21
Supplement: s1 [file s1]

# In silico screening and in vitro assessment of natural products with anti-virulence activity against *Helicobacter pylori*

Maciej Spiegel <sup>1,†,\*</sup>, Paweł Krzyżek <sup>2,†,\*</sup>, Ewa Dworniczek <sup>2</sup>, Ryszard Adamski <sup>3</sup> and Zbigniew Sroka <sup>1</sup>

<sup>1</sup> Department of Pharmacognosy and Herbal Medicines, Wrocław Medical University, Borowska 211A, 50-556 Wrocław, Poland

<sup>2</sup> Department of Microbiology, Faculty of Medicine, Wrocław Medical University, Chalubinskiego 4, 50-368 Wrocław, Poland

<sup>3</sup> Laboratory of Microscopic Techniques, Institute of Genetics and Microbiology, University of Wrocław, Przybyszewskiego 63, 50-001 Wrocław, Poland

\* Correspondence: maciej.spiegel@student.umed.wroc.pl (M.S.), krojcerpawel@gmail.com (P.K.)

† Those authors contributed equally to the paper

**Table S1.** List of phytochemicals tested by virtual screening with their binding free energies ( $\Delta G$  [kcal/mol]) required to attach to the active site of the SpoT protein of *H. pylori*.

| Tested phytochemical            | $\Delta G$ | Tested phytochemical      | $\Delta G$ | Tested phytochemical | $\Delta G$ |
|---------------------------------|------------|---------------------------|------------|----------------------|------------|
| ailanthone                      | -8,1       | amentoflavone             | -8,5       | madecassoside        | 10,6       |
| fortunellin                     | -8,1       | hypericin                 | -8,5       | dioscin              | -9,8       |
| naringin                        | -8,1       | lanatoside_B              | -8,5       | alpha-chaconine      | -9,6       |
| tiliroside                      | -8,1       | hinokiflavone             | -8,4       | alpha-solasonine     | -9,5       |
| ruscogenin                      | -8,1       | solanidine                | -8,3       | rebaudioside_A       | -9,5       |
| chrysanthellin_B                | -8,1       | cupressuflavone           | -8,3       | alpha-solanine       | -9,4       |
| digitoxin                       | -8,1       | diosgenin                 | -8,3       | alpha-solamargine    | -9,3       |
| friedelin                       | -8,1       | asiaticoside              | -8,3       | gracillin            | -9,1       |
| lanatoside_C                    | -8,1       | gypenoside_XVII           | -8,3       | zeaxanthin           | -8,9       |
| kaempferol-7-O-neohesperidoside | -8,0       | K-strophanthoside         | -8,3       | sennidine_A          | -8,9       |
| rutin                           | -8,0       | procyanidin_A1            | -8,2       | chrysanthellin_A     | -8,9       |
| sennoside_A                     | -8,0       | procyanidin_C1            | -8,2       | hederacoside_C       | -8,9       |
| sennoside_B                     | -8,0       | diosmin                   | -8,2       | sennidine_B          | -8,8       |
| sarsasapogenin                  | -8,0       | narirutin                 | -8,2       | glycyrrhizic_acid    | -8,8       |
| corosolic_acid                  | -8,0       | neohesperidin             | -8,2       | gamma-chaconine      | -8,7       |
| echinocystic_acid-3-O-glucoside | -8,0       | rhoifolin                 | -8,2       | protopine            | -8,7       |
| euphol                          | -8,0       | sciadopitysin             | -8,2       | linarin              | -8,7       |
| gitoxin                         | -8,0       | 18-beta-glycyrrhetic_acid | -8,2       | didymin              | -8,6       |
| lupenone                        | -8,0       | alpha-hederin             | -8,2       | eriocitrin           | -8,6       |
| tomatidine                      | -7,9       | digoxin                   | -8,2       | robinin              | -8,6       |
| ginkgolide_B                    | -7,9       | escin                     | -8,2       | protohypericin       | -8,6       |
| hesperidin                      | -7,9       | ginsenoside_Rg2           | -8,2       | ginsenoside_Rb3      | -8,6       |
| kaempferol-3-O-rutinoside       | -7,9       | proscillaridin_A          | -8,2       | ginsenoside_Rg3      | -8,6       |
| vitexin-2''-O-rhamnoside        | -7,9       | pseudoginsenoside_F11     | -8,2       | tomatine             | -8,5       |
| neoruscogenin                   | -7,9       | procyanidin_B2            | -8,1       | procyanidin_A2       | -8,5       |
| caulophyllogenin                | -7,9       |                           |            |                      |            |

|                                |      |                                         |      |                                |      |
|--------------------------------|------|-----------------------------------------|------|--------------------------------|------|
| calendoflavoside               | -7,3 | ginsenoside_Rg1                         | -7,6 | delphinidin-3-O-sambubioside   | -7,8 |
| eupatolin                      | -7,3 | sanguinarine                            | -7,5 | pelargonidin-3-O-rutinoside    | -7,8 |
| gossypetin-8-O-glucuronide     | -7,3 | solasodine                              | -7,5 | 7,8-benzoflavone               | -7,8 |
| luteolin-7-O-glucoside         | -7,3 | tetrahydroalstonine                     | -7,5 | isorhoifolin                   | -7,8 |
| neoeriocitrin                  | -7,3 | procyanidin_B1                          | -7,5 | liquiritin                     | -7,8 |
| ononin                         | -7,3 | baicalin                                | -7,5 | luteolin-4'-O-glucoside        | -7,8 |
| peltatoside                    | -7,3 | icariin                                 | -7,5 | quercetin-3-O-glucuronide      | -7,8 |
| bilobalide                     | -7,3 | isovitexin                              | -7,5 | stigmasterol                   | -7,8 |
| nootkatone                     | -7,3 | quercetin-7-O-glucoside                 | -7,5 | trillin                        | -7,8 |
| 3-O-acetyl-beta-boswellic_acid | -7,3 | schaftoside                             | -7,5 | beta-amyrin                    | -7,8 |
| digitoxigenin                  | -7,3 | spiraeoside                             | -7,5 | ginsenoside_Rb2                | -7,8 |
| notoginsenoside_R1             | -7,3 | trans-epsilon-viniferin                 | -7,5 | lupeol                         | -7,8 |
| quillaic_acid                  | -7,3 | tanshinone_IIA                          | -7,5 | maslinic_acid                  | -7,8 |
| ursolic_acid_methylester       | -7,3 | beta-boswellic_acid                     | -7,5 | uvaol                          | -7,8 |
| ellipticine                    | -7,2 | cucurbitacin_I                          | -7,5 | stevioside                     | -7,7 |
| sempervirine                   | -7,2 | echinocystic_acid                       | -7,5 | luteolin-3',7-di-O-glucoside   | -7,7 |
| beta-cryptoxanthin             | -7,2 | ginsenoside_CK                          | -7,5 | orientin                       | -7,7 |
| andrographolide                | -7,2 | ginsenoside_Rd                          | -7,5 | poncirin                       | -7,7 |
| ginkgolide_J                   | -7,2 | lupeol_acetate                          | -7,5 | salvianolic_acid_B             | -7,7 |
| avicularin                     | -7,2 | madecassic_acid                         | -7,5 | frangulin_A                    | -7,7 |
| genistein-7-O-glucuronide      | -7,2 | protopanaxadiol                         | -7,5 | 11beta,13-dihydrolactucopicrin | -7,7 |
| kaempferol-3-O-rhamnoside      | -7,2 | ursolic_acid                            | -7,5 | 11-keto-beta-boswellic_acid    | -7,7 |
| neodiosmin                     | -7,2 | senkirkine                              | -7,4 | 18-alpha-glycyrrhetic_acid     | -7,7 |
| alpha-tocotrienol              | -7,2 | flavanomarein                           | -7,4 | beta-amyrin_acetate            | -7,7 |
| amarogentin                    | -7,2 | glabridin                               | -7,4 | betulinic_acid                 | -7,7 |
| stachyose                      | -7,2 | guaijaverin                             | -7,4 | cucurbitacin_D                 | -7,7 |
| amygdalin                      | -7,2 | hesperetin-7-O-glucoside                | -7,4 | cucurbitacin_E                 | -7,7 |
| hamamelitannin                 | -7,2 | isoschaftoside                          | -7,4 | erythrodil                     | -7,7 |
| 3,5-di-O-caffeoyl_quinic_acid  | -7,2 | quercetin-3,4'-di-O-glucoside           | -7,4 | ginsenoside_Rf                 | -7,7 |
| maritimein                     | -7,2 | vitexin                                 | -7,4 | oleanolic_acid                 | -7,7 |
| bulnesol                       | -7,2 | nuzhenide                               | -7,4 | GTP_B                          | -7,6 |
| guaiazulene                    | -7,2 | trifolirhizin                           | -7,4 | conessine                      | -7,6 |
| guaiol                         | -7,2 | 3-O-acetyl-11-keto-beta-boswellic_acid  | -7,4 | keracyanin                     | -7,6 |
| cucurbitacin_B                 | -7,2 | alpha-boswellic_acid                    | -7,4 | gallocatechin_gallate          | -7,6 |
| ginsenoside_Rh2                | -7,2 | medicagenic_acid                        | -7,4 | procyanidin_B3                 | -7,6 |
| GTP_C                          | -7,1 | oleanolic_acid_methylester              | -7,4 | datiscin                       | -7,6 |
| chelidonine                    | -7,1 | syrotingopine                           | -7,3 | eriodictyol-7-O-glucoside      | -7,6 |
| yohimbic_acid                  | -7,1 | cyanidin-3-O-sambubioside-5-O-glucoside | -7,3 | isorhamnetin-3-O-rutinoside    | -7,6 |
| yohimbine                      | -7,1 | cyanidin-3-O-sophoroside                | -7,3 | kaempferol-7-O-glucoside       | -7,6 |
| callistephin                   | -7,1 | delphin                                 | -7,3 | puerarin                       | -7,6 |
| bavachin                       | -7,1 | ideain                                  | -7,3 | harpagoside                    | -7,6 |
| daidzin                        | -7,1 | myrtillin                               | -7,3 | alpha-amyrin                   | -7,6 |
| diosmetin-7-O-glucoside        | -7,1 | epicatechin_gallate                     | -7,3 | ginsenoside_Rc                 | -7,6 |

|                             |      |                            |      |                                 |      |
|-----------------------------|------|----------------------------|------|---------------------------------|------|
| beta-tocotrienol            | -6,8 | ajmalicine                 | -6,9 | glycitin                        | -7,1 |
| agnuside                    | -6,8 | gelsemine                  | -6,9 | gossypin                        | -7,1 |
| trilobatin                  | -6,8 | cyanin                     | -6,9 | homoorientin                    | -7,1 |
| beta-sitosterol             | -6,8 | malvin                     | -6,9 | silybin                         | -7,1 |
| aloin_B                     | -6,8 | pelargonin                 | -6,9 | garcinoic_acid                  | -7,1 |
| 11beta,13-dihydrolactucin   | -6,8 | ginkgolide_C               | -6,9 | cynarin                         | -7,1 |
| mangiferin                  | -6,8 | 2'-methoxyflavone          | -6,9 | isoliquiritin                   | -7,1 |
| seneciphylline              | -6,7 | genistin                   | -6,9 | leontopodic_acid                | -7,1 |
| capsanthin                  | -6,7 | kaempferol-3-O-glucoside   | -6,9 | polydatin                       | -7,1 |
| bergamottin                 | -6,7 | karanjin                   | -6,9 | sesamin                         | -7,1 |
| wedelolactone               | -6,7 | luteolin                   | -6,9 | frangulin_B                     | -7,1 |
| 3-hydroxyflavone            | -6,7 | myricetin-3-O-glucoside    | -6,9 | alantolactone                   | -7,1 |
| 7-hydroxy-5-methylflavone   | -6,7 | quercitrin                 | -6,9 | 3-O-acetyl-alpha-boswellic_acid | -7,1 |
| gossypetin                  | -6,7 | gluconasturtiin            | -6,9 | betulin                         | -7,1 |
| myricetin-3-O-galactoside   | -6,7 | delta-tocotrienol          | -6,9 | betulin_diacetate               | -7,1 |
| syringetin                  | -6,7 | marein                     | -6,9 | cymaritin                       | -7,1 |
| glucoerucin                 | -6,7 | rhapontin                  | -6,9 | elemolic_acid                   | -7,1 |
| glucoraphanin               | -6,7 | cholesterol                | -6,9 | ginsenoside_Rb1                 | -7,1 |
| catalpol                    | -6,7 | fucosterol                 | -6,9 | hederagenin                     | -7,1 |
| gentianose                  | -6,7 | aloin_A                    | -6,9 | chelerythrine                   | -7,0 |
| phloretic_acid              | -6,7 | dihydroartemisinin         | -6,9 | corynanthine                    | -7,0 |
| bisdemethoxycurcumin        | -6,7 | trans-caryophyllene        | -6,9 | emetine                         | -7,0 |
| chicoric_acid               | -6,7 | cycloartenol_acetate       | -6,9 | rauwolscine                     | -7,0 |
| ellagic_acid                | -6,7 | cyanidin                   | -6,8 | lutein                          | -7,0 |
| aromadendrene               | -6,7 | apocarotenal               | -6,8 | catechin_gallate                | -7,0 |
| picrotin                    | -6,7 | beta-carotene              | -6,8 | ginkgolide_A                    | -7,0 |
| berberine                   | -6,6 | marrubiin                  | -6,8 | daidzein-7-O-glucuronide        | -7,0 |
| cinchonidine                | -6,6 | 5-methoxyflavone           | -6,8 | eriodictyol                     | -7,0 |
| harman                      | -6,6 | 7-hydroxyflavone           | -6,8 | flavone                         | -7,0 |
| senecionine                 | -6,6 | 7-hydroxyflavonol          | -6,8 | quercetagenin-7-O-glucoside     | -7,0 |
| cyanidin-3-O-arabinoside    | -6,6 | apigenin-7-O-glucoside     | -6,8 | quercetin-3-O-glucopyranoside   | -7,0 |
| delphinidin-3-O-galactoside | -6,6 | bavachinin                 | -6,8 | sophoricoside                   | -7,0 |
| kuromanin                   | -6,6 | hyperoside                 | -6,8 | gamma-tocotrienol               | -7,0 |
| lycopene                    | -6,6 | isosakuranetin             | -6,8 | echinacoside                    | -7,0 |
| auraptene                   | -6,6 | kaempferol-3-O-glucuronide | -6,8 | sesamolin                       | -7,0 |
| 3',4'-dihydroxyflavone      | -6,6 | myricitrin                 | -6,8 | verbascoside                    | -7,0 |
| 4',7'-dihydroxyflavone      | -6,6 | naringenin-7-O-glucoside   | -6,8 | carminic_acid                   | -7,0 |
| 4'-hydroxyflavanone         | -6,6 | pinobanksin                | -6,8 | alpha-cedrene                   | -7,0 |
| galangin                    | -6,6 | pinocembrin                | -6,8 | chamazulen                      | -7,0 |
| pratol                      | -6,6 | saponarin                  | -6,8 | zerumbone                       | -7,0 |
| tectochrysin                | -6,6 | sissotrin                  | -6,8 | poststerone                     | -7,0 |
| glucobrassicin              | -6,6 | 4-methoxyglucobrassicin    | -6,8 | asiatic_acid                    | -7,0 |
| glucomoringin               | -6,6 | neoglucobrassicin          | -6,8 | betulinic_acid_methyl_ester     | -7,0 |

|                                          |      |                                          |      |                               |      |
|------------------------------------------|------|------------------------------------------|------|-------------------------------|------|
| demethoxycurcumin                        | -6,4 | luteolinidin                             | -6,4 | glucotropaeolin               | -6,6 |
| isoliquiritigenin                        | -6,4 | oenin                                    | -6,4 | sinalbin                      | -6,6 |
| sieboldin                                | -6,4 | catechin                                 | -6,4 | delta-amplexichromanol        | -6,6 |
| emodin                                   | -6,4 | galocatechin                             | -6,4 | 2-hydroxychalcone             | -6,6 |
| alpha-santonin                           | -6,4 | coumestrol                               | -6,4 | deoxyrhapontin                | -6,6 |
| beta-curcumene                           | -6,4 | esculetin                                | -6,4 | phloridizin                   | -6,6 |
| protopanaxatriol                         | -6,4 | 3',4',7,8-tetrahydroxyflavone            | -6,4 | podophyllotoxin               | -6,6 |
| ATP_C                                    | -6,3 | 3',4',7-trihydroxyflavone                | -6,4 | usnic_acid                    | -6,6 |
| ATP_B                                    | -6,3 | 5,7-dihydroxy-3',4',5'-trimethoxyflavone | -6,4 | anthraquinone                 | -6,6 |
| monocrotalin                             | -6,3 | 5,7-dimethoxyflavanone                   | -6,4 | cedrol                        | -6,6 |
| delphinidin                              | -6,3 | 5-methyl-7-methoxyisoflavone             | -6,4 | parthenolide                  | -6,6 |
| malvidin                                 | -6,3 | 6-hydroxyflavone                         | -6,4 | ginsenoside_Rh1               | -6,6 |
| robinetinidin                            | -6,3 | 6-methoxyluteolin                        | -6,4 | atropine                      | -6,5 |
| epigallocatechin                         | -6,3 | 7,8-dihydroxyflavone                     | -6,4 | hyoscyamine                   | -6,5 |
| 4-methylumbelliferone                    | -6,3 | 7-hydroxyflavanone                       | -6,4 | piperine                      | -6,5 |
| 7-methylcoumarin                         | -6,3 | 7-methoxyflavone                         | -6,4 | fraxin                        | -6,5 |
| coumestrol_dimethyl_ether                | -6,3 | baicalein                                | -6,4 | carnosol                      | -6,5 |
| dalbergin                                | -6,3 | datiscetin                               | -6,4 | 3-methoxyflavone              | -6,5 |
| esculin                                  | -6,3 | flavanone                                | -6,4 | 5-hydroxyflavone              | -6,5 |
| imperatorin                              | -6,3 | geraldol                                 | -6,4 | 5-methoxyflavanone            | -6,5 |
| 3',4',7,8-tetramethoxyflavone            | -6,3 | herbacetin                               | -6,4 | 6-methoxyflavanone            | -6,5 |
| 3',4'-dimethoxyflavone                   | -6,3 | kaempferide                              | -6,4 | 6-methoxyflavone              | -6,5 |
| 3,6-dihydroxyflavone                     | -6,3 | kaempferol                               | -6,4 | apigenin                      | -6,5 |
| 3,7-dihydroxy-3',4',5'-trimethoxyflavone | -6,3 | naringenin                               | -6,4 | baicalein-7-methylether       | -6,5 |
| 4'-methoxyflavanone                      | -6,3 | pinocembrin-7-methylether                | -6,4 | chrysin                       | -6,5 |
| 6-hydroxyflavanone                       | -6,3 | quercetin                                | -6,4 | chrysin_dimethyl_ether        | -6,5 |
| 7-methoxyflavonol                        | -6,3 | syringetin-3-O-glucoside                 | -6,4 | chrysoeriol                   | -6,5 |
| acacetin                                 | -6,3 | tamarixetin                              | -6,4 | liquiritigenin                | -6,5 |
| diosmetin                                | -6,3 | taxifolin                                | -6,4 | myricetin                     | -6,5 |
| hesperetin                               | -6,3 | tricetin                                 | -6,4 | scutellarein                  | -6,5 |
| homoeriodictyol                          | -6,3 | glucoraphenin                            | -6,4 | wogonin                       | -6,5 |
| isorhamnetin-3-O-glucoside               | -6,3 | alpha-tocopherol                         | -6,4 | 13'-carboxy-alpha-tocopherol  | -6,5 |
| isorhamnetin                             | -6,3 | hastatoside                              | -6,4 | 4-cymene                      | -6,5 |
| quercetagenin                            | -6,3 | menthofuran                              | -6,4 | carvacrol                     | -6,5 |
| sinensetin                               | -6,3 | shanzhiside_methyl_ester                 | -6,4 | harpagide                     | -6,5 |
| syringetin-3-O-galactoside               | -6,3 | verbenalin                               | -6,4 | loganic_acid                  | -6,5 |
| tangeretin                               | -6,3 | vulpic_acid                              | -6,4 | evernic_acid                  | -6,5 |
| tricetin_pentamethyl_ether               | -6,3 | 4'-hydroxychalcone                       | -6,4 | chalcone                      | -6,5 |
| glucolimnanthin                          | -6,3 | 4'-methoxychalcone                       | -6,4 | neohesperidin_dihydrochalcone | -6,5 |
| gluconapin                               | -6,3 | 4,4'-dimethoxychalcone                   | -6,4 | sulfuretin                    | -6,5 |
| azulene                                  | -6,3 | 4-hydroxychalcone                        | -6,4 | ATP_A                         | -6,4 |
| gamma-terpinene                          | -6,3 | 4-methoxychalcone                        | -6,4 | ajmaline                      | -6,4 |
| limonene                                 | -6,3 | chlorogenic_acid                         | -6,4 | laudanoline                   | -6,4 |

|                                            |      |                                |      |                                        |      |
|--------------------------------------------|------|--------------------------------|------|----------------------------------------|------|
| 2'-hydroxyflavanone                        | -6,0 | magnolol                       | -6,2 | sabinene                               | -6,3 |
| 3',4',7-trihydroxyisoflavone               | -6,0 | aloe-emodin                    | -6,2 | terpinolene                            | -6,3 |
| 5,7-dihydroxy-3',4',5'-trimethoxyflavanone | -6,0 | rhein                          | -6,2 | trehalose                              | -6,3 |
| eupatorin-5-methylether                    | -6,0 | alpha-curcumene                | -6,2 | picein                                 | -6,3 |
| fustin                                     | -6,0 | longifolene                    | -6,2 | 2',6'-dihydroxy-4,4'-dimethoxychalcone | -6,3 |
| genistein-4',7-dimethylether               | -6,0 | palmatine                      | -6,1 | neochlorogenic_acid                    | -6,3 |
| glycitein                                  | -6,0 | apigeninidin                   | -6,1 | rosmarinic_acid                        | -6,3 |
| irisflorentin                              | -6,0 | psoralen                       | -6,1 | salidroside                            | -6,3 |
| kaempferol_3,7,4'-trimethyl_ether          | -6,0 | kirenil                        | -6,1 | alizarin                               | -6,3 |
| nobiletin                                  | -6,0 | 7,8-dimethoxyflavone           | -6,1 | chrysophanol                           | -6,3 |
| prunetin                                   | -6,0 | baicalein-5,6,7-trimethylether | -6,1 | lapachol                               | -6,3 |
| quercetin-3,7,3',4'-tetramethyl_ether      | -6,0 | biochanin_A                    | -6,1 | alpha-bisabolol                        | -6,3 |
| quercetin-3-methylether                    | -6,0 | genistein                      | -6,1 | cynaropicrin                           | -6,3 |
| resokaempferol                             | -6,0 | genkwanin                      | -6,1 | quinidine                              | -6,2 |
| glucoiberin                                | -6,0 | quercetin_3,4'-dimethyl_ether  | -6,1 | vincamine                              | -6,2 |
| 3-carene                                   | -6,0 | rhamnazin                      | -6,1 | epicatechin                            | -6,2 |
| isomenthol                                 | -6,0 | rhamnetin                      | -6,1 | carnosic_acid                          | -6,2 |
| butein                                     | -6,0 | sakuranetin                    | -6,1 | forskolin                              | -6,2 |
| flavokawain_A                              | -6,0 | glucobacteroin                 | -6,1 | apigenin-4',5,7-trimethylether         | -6,2 |
| hesperetin_dihydrochalcone-4'-O-glucoside  | -6,0 | delta-tocopherol               | -6,1 | dihydromyricetin                       | -6,2 |
| syringin                                   | -6,0 | 2-carene                       | -6,1 | dihydorobinetin                        | -6,2 |
| flavokawain_B                              | -6,0 | alpha-terpinene                | -6,1 | equol                                  | -6,2 |
| myricanol                                  | -6,0 | aucubin                        | -6,1 | eupatorin                              | -6,2 |
| 1,8-dihydroxyanthraquinone                 | -6,0 | cuminaldehyde                  | -6,1 | fisetin                                | -6,2 |
| plumbagin                                  | -6,0 | oleuropein                     | -6,1 | ipriflavone                            | -6,2 |
| acetoxyvaleric_acid                        | -6,0 | R-pulegone                     | -6,1 | isoxanthohumol                         | -6,2 |
| fisetinidin                                | -5,9 | alpha-sophorose                | -6,1 | morin                                  | -6,2 |
| pelargonidin                               | -5,9 | 3-hydroxybenzoic_acid          | -6,1 | robinetin                              | -6,2 |
| bergaptol                                  | -5,9 | aberrchrome_540                | -6,1 | glucocheirolin                         | -6,2 |
| coumarin                                   | -5,9 | 3-coumaric_acid                | -6,1 | beta-tocopherol                        | -6,2 |
| 3',4',5,5',6,7-hexamethoxyflavone          | -5,9 | chlorogenic_acid_methylester   | -6,1 | gentiopicroside                        | -6,2 |
| 6,7,4'-trihydroxyisoflavone                | -5,9 | curcumin                       | -6,1 | loganin                                | -6,2 |
| quercetin-3,5,7,3',4'-pentamethylether     | -5,9 | flavokawain_C                  | -6,1 | piperitone                             | -6,2 |
| scutellarein_tetramethyl_ether             | -5,9 | homobutein                     | -6,1 | sweroside                              | -6,2 |
| glucoarabin                                | -5,9 | hypophyllanthin                | -6,1 | beta-gentiobiose                       | -6,2 |
| glucolipidiin                              | -5,9 | yangonin                       | -6,1 | DL-kawain                              | -6,2 |
| gamma-tocopherol                           | -5,9 | physcion                       | -6,1 | ligustilide                            | -6,2 |
| ajugol                                     | -5,9 | (3aR)-sclareolide              | -6,1 | 2'-hydroxychalcone                     | -6,2 |
| alpha-thujone                              | -5,9 | GTP_A                          | -6,0 | 2,3-dimethoxy-2'-hydroxychalcone       | -6,2 |
| carvacryl_acetate                          | -5,9 | boldine                        | -6,0 | 3,4-dimethoxychalcone                  | -6,2 |
| geniposide                                 | -5,9 | quinine                        | -6,0 | resveratrol                            | -6,2 |
| isopulegol                                 | -5,9 | guibourtinidin                 | -6,0 | xanthohumol                            | -6,2 |
|                                            |      | angelicin                      | -6,0 | honokiol                               | -6,2 |

|                                    |      |                                |      |                                |      |
|------------------------------------|------|--------------------------------|------|--------------------------------|------|
| gallic_acid                        | -5,3 | nordihydroguaiaretic_acid      | -5,7 | menthyl_acetate                | -5,9 |
| methylgallate                      | -5,3 | juglone                        | -5,7 | R-alpha-phellandrene           | -5,9 |
| phloroglucinol                     | -5,3 | 4-methoxycoumarin              | -5,6 | valtrate                       | -5,9 |
| 4-coumaric_acid                    | -5,3 | 6,7-dihydroxy-4-methylcoumarin | -5,6 | 3,4-dihydroxyacetophenone      | -5,9 |
| cinnamic_acid_ethyl_ester          | -5,3 | 6-hydroxycoumarin              | -5,6 | 4-(4-hydroxyphenyl)-2-butanone | -5,9 |
| cinnamic_acid_methyl_ester         | -5,3 | 7-ethoxycoumarin               | -5,6 | 4-hydroxybenzoic_acid          | -5,9 |
| trans-cinnamic_acid                | -5,3 | citropten                      | -5,6 | ethyl-4-hydroxybenzoate        | -5,9 |
| khellin                            | -5,3 | herniarin                      | -5,6 | hydroxytyrosol                 | -5,9 |
| convolvamine                       | -5,2 | isopimpinellin                 | -5,6 | eriodictyol_chalcone           | -5,9 |
| daphnetin-7-methylether            | -5,2 | isoscopoletin                  | -5,6 | hesperetin_dihydrochalcone     | -5,9 |
| daphnetin                          | -5,2 | luteolin_tetramethylether      | -5,6 | piceatannol                    | -5,9 |
| chrysanthemyl_alcohol              | -5,2 | 1,4-cineole                    | -5,6 | lawsone                        | -5,9 |
| 4-O-methylgallic_acid              | -5,2 | alpha-terpineol                | -5,6 | 3,4-dihydrocoumarin            | -5,8 |
| catechol                           | -5,2 | beta-pinene                    | -5,6 | 4-methyl-7-ethoxycoumarin      | -5,8 |
| methyl-4-hydroxybenzoate           | -5,2 | chrysanthemolactone            | -5,6 | bergapten                      | -5,8 |
| fraxetin                           | -5,1 | terpinen-4-ol                  | -5,6 | isobergapten                   | -5,8 |
| fraxidin                           | -5,1 | D-saccharose                   | -5,6 | umbelliferone                  | -5,8 |
| estragole                          | -5,1 | alpha-ionone                   | -5,6 | xanthotoxol                    | -5,8 |
| lavandulyl_acetate                 | -5,1 | D-salicin                      | -5,6 | 4',6,7-trimethoxyisoflavone    | -5,8 |
| linalool                           | -5,1 | protocatechualdehyde           | -5,6 | casticin                       | -5,8 |
| myrcene                            | -5,1 | cinnamyl_acetate               | -5,6 | daidzein                       | -5,8 |
| acetoisovanillone                  | -5,1 | tetrahydro-curcumin            | -5,6 | gardenin_A                     | -5,8 |
| acetovanillon                      | -5,1 | arbutin                        | -5,6 | glucobrassicinapin             | -5,8 |
| homogentisic_acid                  | -5,1 | carophyllene_oxide             | -5,6 | carvone                        | -5,8 |
| myristicin                         | -5,1 | farnesol                       | -5,6 | phloretin                      | -5,8 |
| 2-coumaric_acid                    | -5,1 | dihydrocapsaicin               | -5,5 | valerenic_acid                 | -5,8 |
| 3,4,5-trihydroxycinnamic_acid      | -5,1 | sparteine                      | -5,5 | cytisine                       | -5,7 |
| ferulic_acid                       | -5,1 | 5,7-dihydroxy-4-methylcoumarin | -5,5 | piperlongumine                 | -5,7 |
| ferulic_acid_methyl_ester          | -5,1 | scopoletin                     | -5,5 | 3-hydroxycoumarin              | -5,7 |
| phyllanthin                        | -5,1 | sabinyal_acetate               | -5,5 | 4-hydroxycoumarin              | -5,7 |
| sinapic_acid                       | -5,1 | thymol                         | -5,5 | 5-geranyloxy-7-methoxycoumarin | -5,7 |
| trans-nerolidol                    | -5,1 | 5-hydroxy-L-tryptophan         | -5,4 | osthol                         | -5,7 |
| procaine                           | -5,0 | 6,7-dimethylesculetin          | -5,4 | xanthotoxin                    | -5,7 |
| tyramine                           | -5,0 | alpha-pinene                   | -5,4 | 4',7-dimethoxyisoflavone       | -5,7 |
| camphene                           | -5,0 | isomenthone                    | -5,4 | formononetin                   | -5,7 |
| isobornyl_acetate                  | -5,0 | verbenone                      | -5,4 | epiprogoitrin                  | -5,7 |
| myrtenol                           | -5,0 | ethylgallate                   | -5,4 | progoitrin                     | -5,7 |
| trans-myrtanol                     | -5,0 | visnagin                       | -5,4 | 13'-hydroxy-alpha-tocopherol   | -5,7 |
| D-glucose                          | -5,0 | nonivamide                     | -5,3 | menthol                        | -5,7 |
| D-mannose                          | -5,0 | physalien                      | -5,3 | beta-damascone                 | -5,7 |
| 4-hydroxybenzoic_acid_propyl_ester | -5,0 | fenchone                       | -5,3 | dhurrin                        | -5,7 |
| 6-shogaol                          | -5,0 | genipin                        | -5,3 | helicin                        | -5,7 |
| 8-gingerol                         | -5,0 | 3-O-methylgallic_acid          | -5,3 | trans-cinnamaldehyde           | -5,7 |

|                     |      |                            |      |                                |      |
|---------------------|------|----------------------------|------|--------------------------------|------|
| linoleic_acid       | -4,6 | dillapiole                 | -4,9 | acetyeugenol                   | -5,0 |
| oleic_acid          | -4,6 | caffeine                   | -4,8 | alpha-asarone                  | -5,0 |
| borneol             | -4,6 | synephrine                 | -4,8 | eugenol                        | -5,0 |
| isoborneol          | -4,6 | camphor                    | -4,8 | eugenol_methylether            | -5,0 |
| linalyl_acetate     | -4,6 | citral                     | -4,8 | homovanillic_acid              | -5,0 |
| D-fructose          | -4,6 | citronellol                | -4,8 | quinic_acid                    | -5,0 |
| D-xylose            | -4,6 | eucalyptol                 | -4,8 | tyrosol                        | -5,0 |
| L-arabinose         | -4,6 | lavandulol                 | -4,8 | caffeic_acid                   | -5,0 |
| vanillin            | -4,6 | nerol                      | -4,8 | caffeic_acid_ethyl_ester       | -5,0 |
| embelin             | -4,6 | acetosyringon              | -4,8 | coniferyl_alcohol              | -5,0 |
| geraniol            | -4,5 | gentisic_acid              | -4,8 | theophylline                   | -4,9 |
| beta-asarone        | -4,5 | salicylic_acid_methylester | -4,8 | alpha-tocopherol_acetate       | -4,9 |
| pseudopelletierine  | -4,4 | syringic_acid              | -4,8 | bornyl_acetate                 | -4,9 |
| linolenic_acid      | -4,4 | dihydrocaffeic_acid        | -4,8 | citronellal                    | -4,9 |
| gamma-nonolactone   | -4,4 | dihydroconiferyl_alcohol   | -4,8 | citronellyl_acetate            | -4,9 |
| L-arginine          | -4,3 | isoferulic_acid            | -4,8 | geranyl_acetate                | -4,9 |
| gamma-undecalactone | -4,3 | theobromine                | -4,7 | D-galactose                    | -4,9 |
| L-theanine          | -4,2 | petroselinic_acid          | -4,7 | L-rhamnose                     | -4,9 |
| palmitic_acid       | -4,2 | 10-gingerol                | -4,7 | 2,3-dihydroxybenzoic_acid      | -4,9 |
| Betonidine          | -4,1 | alpha-resorcylic_acid      | -4,7 | 2-phenylethanol                | -4,9 |
| L-alliin            | -4,1 | benzyl_alcohol             | -4,7 | 3,4-dihydroxyphenylacetic_acid | -4,9 |
| stachydrine         | -4,1 | isovanillin                | -4,7 | 4-hydroxybenzaldehyde          | -4,9 |
| myristic_acid       | -4,1 | dihydrosinapyl_alcohol     | -4,7 | 4-hydroxyphenylacetic_acid     | -4,9 |
| 3-octanone          | -4,0 | apiol                      | -4,7 | 6-gingerol                     | -4,9 |
| S-allyl-L-cysteine  | -3,9 | lupinine                   | -4,6 | protocatechuic_acid            | -4,9 |
|                     |      | trigonelline               | -4,6 | vanillic_acid                  | -4,9 |

1

2



**Table S2.** Results of literature search showing a low or acceptable toxicity profile of phytochemicals selected for testing in the current study.

| Selected compound | Reference(s) indicating acceptable toxicity profile |
|-------------------|-----------------------------------------------------|
| Dioscin           | [97,98]                                             |
| Hypericin         | [99,100]                                            |
| Amentoflavone     | [101]                                               |
| Aescin            | [102]                                               |
| Glycyrrhetic acid | [103]                                               |
| Ginsenoside Rg3   | [104]                                               |
| Procyanidin A2    | [105]                                               |
| Procyanidin C1    | [105]                                               |
| Robinin           | [106]                                               |
| Zeaxanthin        | [107,108]                                           |

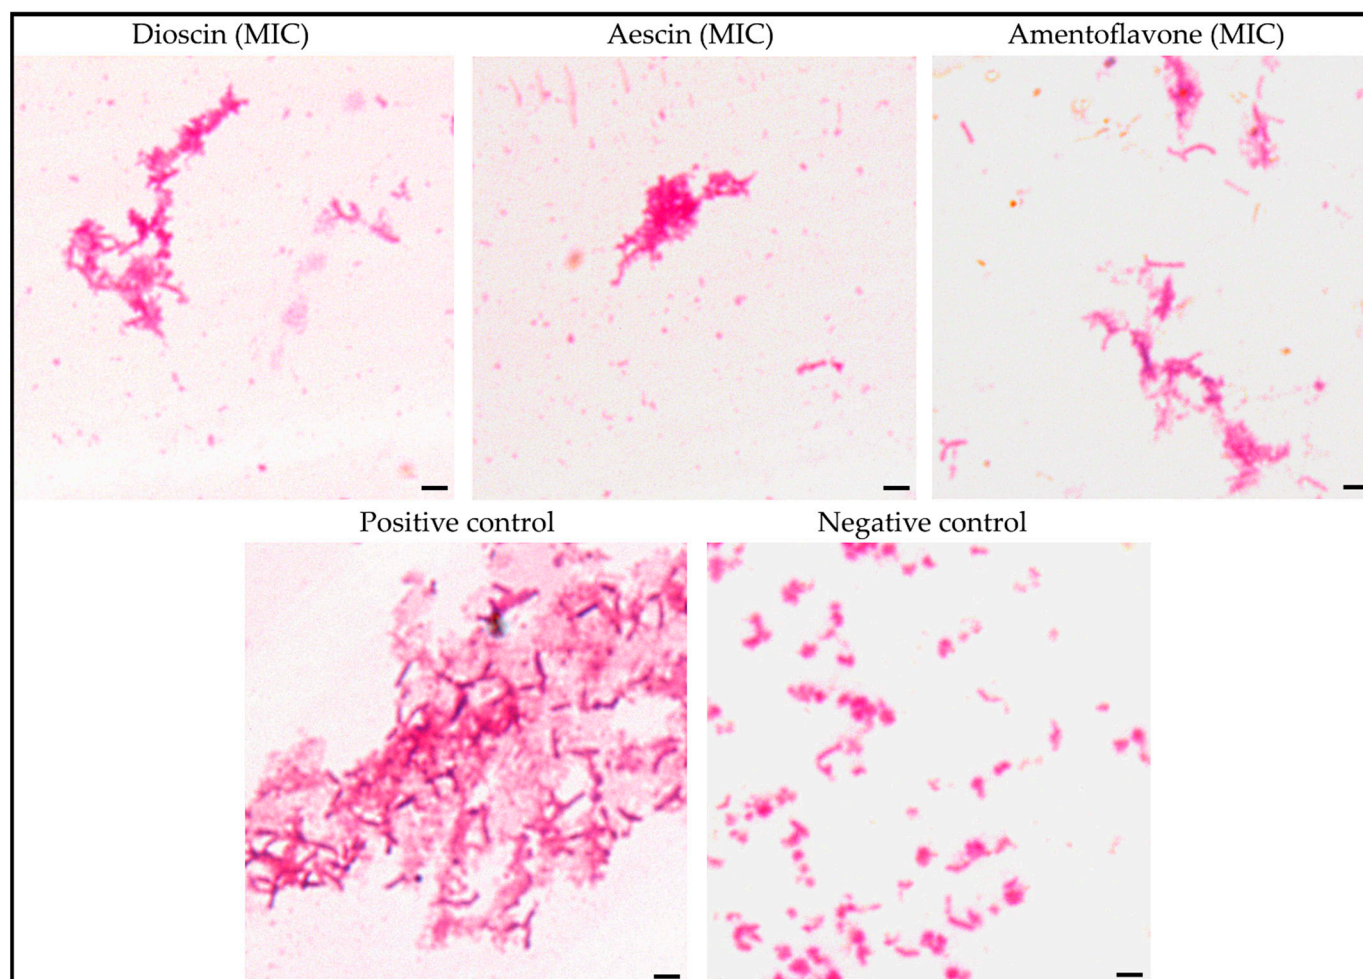

**Figure S1.** Representative photos presenting bacterial morphology observed after a 72-h exposure of *H. pylori* J99 to the tested compounds (dioscin (64 µg/mL), aescin (256 µg/mL), or amentoflavone (128 µg/mL)). Positive and negative control samples were bacteria not exposed to any antimicrobial and treated with minimal inhibitory concentration of amoxicillin (0.06 µg/mL), respectively. The elongated cylindrical forms are bacteria of the rod/spiral shape, while tiny spherical cells present coccoid forms. Scale bars show 2 µm.



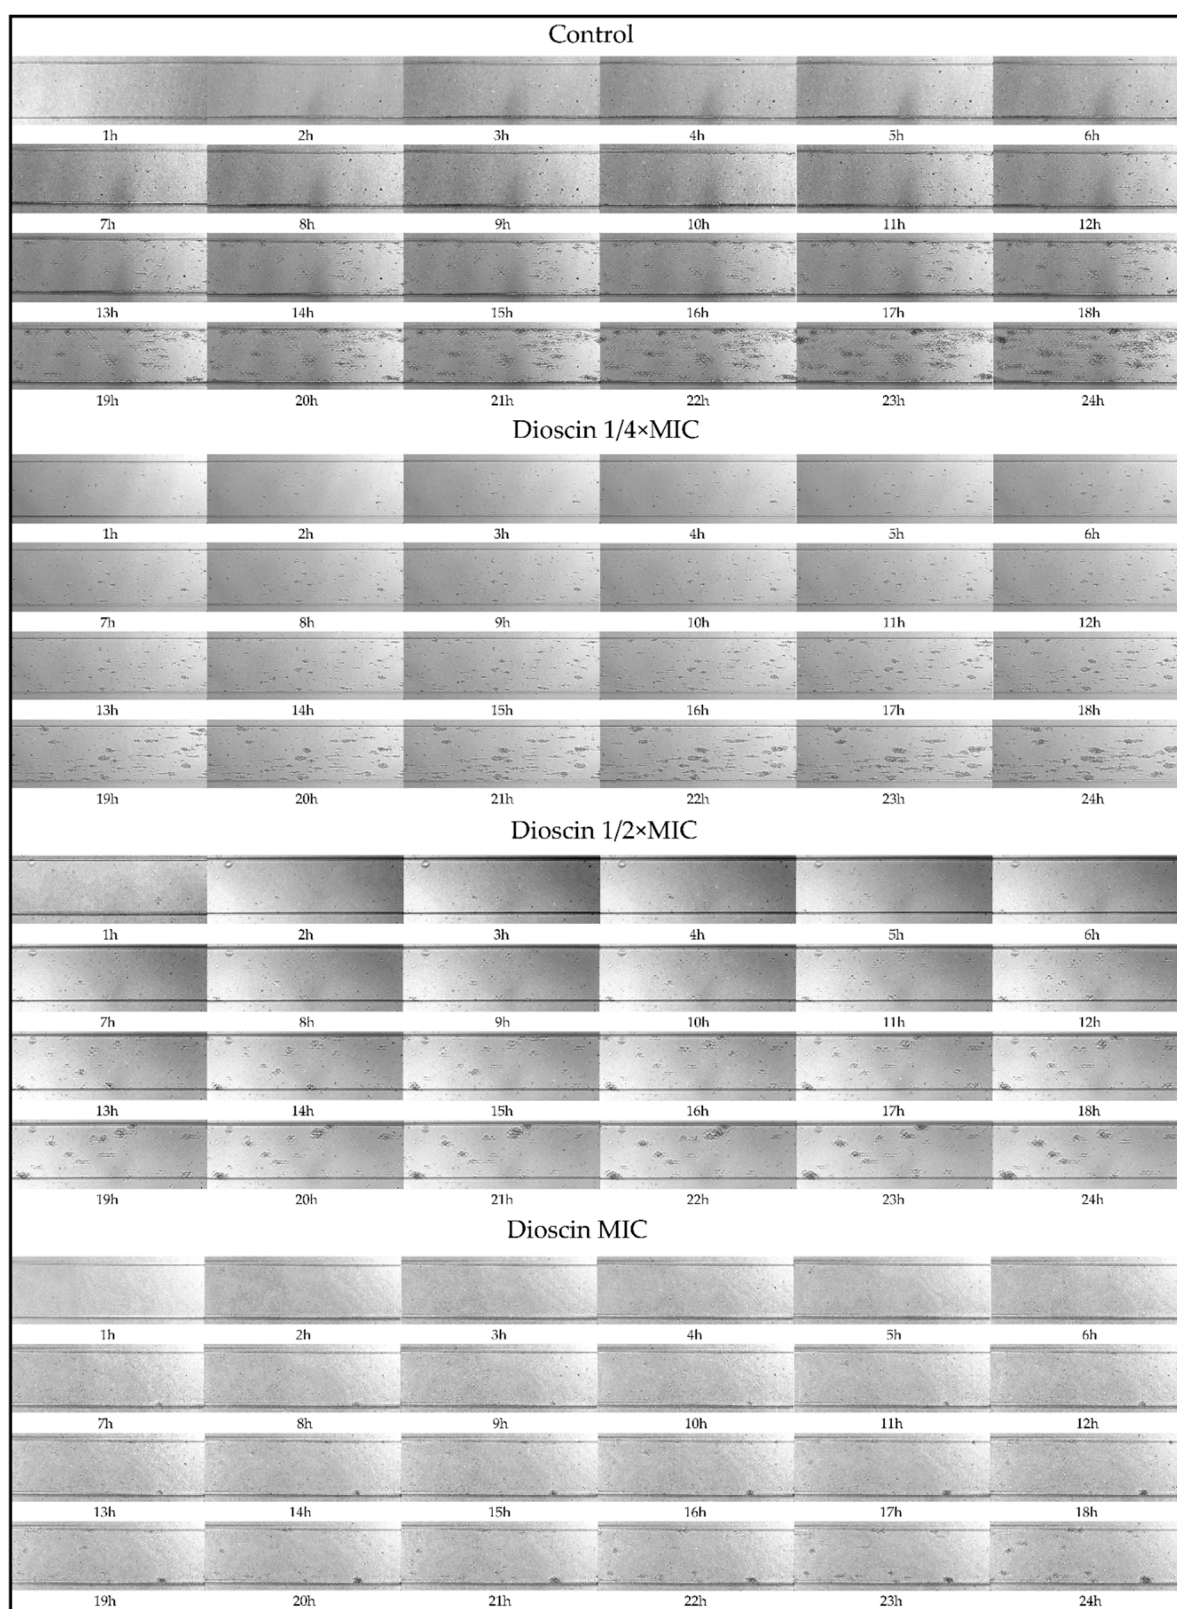

**Figure S2.** Representative photos obtained during time-lapse microscopy recordings from experiments determining anti-biofilm activity of dioscin under flow conditions against *H. pylori* J99. The flow conditions were generated using the Bioflux 1000 system. The MIC,  $\frac{1}{2}\times$ MIC and  $\frac{1}{4}\times$ MIC had values of 64  $\mu\text{g/mL}$ , 32  $\mu\text{g/mL}$ , and 16  $\mu\text{g/mL}$ , respectively. Control samples were bacteria not exposed to any concentration of dioscin.
